# Supplementary material
Source: ML conference proceedings conference paper supplement (https://openaccess.thecvf.com/content/ICCV_2019/html/Esteves_Equivariant_Multi-View_Networks_ICCV_2019_paper.html)
Supplement: Supplementary file 1 [file Esteves_Equivariant_Multi-View_Networks_ICCV_2019_supplemental.zip]

Archive with 2 entries (2 files):
- 5370-supp.pdf
- animations-12-20-60-combined.gif
